# Supplementary material for: A preliminary study of fingerprint aging using near infrared hyperspectral imaging (NIR-HSI)
Source: Royal Society of Chemistry journal article supplement (doi:10.1039/d3ay01386c), 2023-01-01
Supplement: d3ay01386c1.pdf [file d3ay01386c1.pdf]

**Support Information**

**Table S1** - Donor information.

| Donor | Gender | Age | BMI   | Races (self-declared)   | Medication use                                                     |
|-------|--------|-----|-------|-------------------------|--------------------------------------------------------------------|
| 01    | F      | 28  | 20.2  | White/Caucasian         | -                                                                  |
| 02    | F      | 58  | 22.7  | White/Caucasian         | Diabetes/ Cholesterol                                              |
| 03    | F      | 59  | 23.2  | White/Caucasian         | Diabetes                                                           |
| 04    | F      | 21  | 20.44 | White/Caucasian         | -                                                                  |
| 05    | F      | 52  | 24.99 | White/Caucasian         | -                                                                  |
| 06    | F      | 62  | 25.24 | "Pardo" (brown-skinned) | Diabetes/ Cholesterol /<br>Hypertension/ Tuberculosis<br>Treatment |
| 07    | F      | 50  | 27.24 | "Pardo" (brown-skinned) | -                                                                  |
| 08    | F      | 25  | 19.23 | White/Caucasian         | Hypothyroidism                                                     |
| 11    | M      | 60  | 30.39 | White/Caucasian         | Diabetes/ Hypertension                                             |
| 12    | M      | 63  | 24.96 | White/Caucasian         | Hypertension / vitamin complex                                     |
| 13    | M      | 29  | 17.36 | "Pardo" (brown-skinned) | -                                                                  |
| 14    | M      | 34  | 28.08 | "Pardo" (brown-skinned) | -                                                                  |
| 15    | M      | 38  | 33.89 | "Pardo" (brown-skinned) | Diabetes/ Hypertension                                             |

\* BMI is calculated by dividing weight (kg) by the square of height (m).

**Table S2** – Test days (TE1 and TE2) for each donor.

| Donor | Test |     |
|-------|------|-----|
|       | TE1  | TE2 |
| D01   | t06  | t15 |
| D02   | t03  | t12 |
| D03   | t09  | t18 |
| D04   | t06  | t12 |
| D05   | t03  | t15 |
| D06   | t09  | t15 |
| D07   | t09  | t18 |
| D08   | t03  | t15 |
| D11   | t03  | t18 |
| D12   | t06  | t15 |
| D13   | t09  | t15 |
| D14   | t09  | t18 |
| D15   | t06  | t18 |

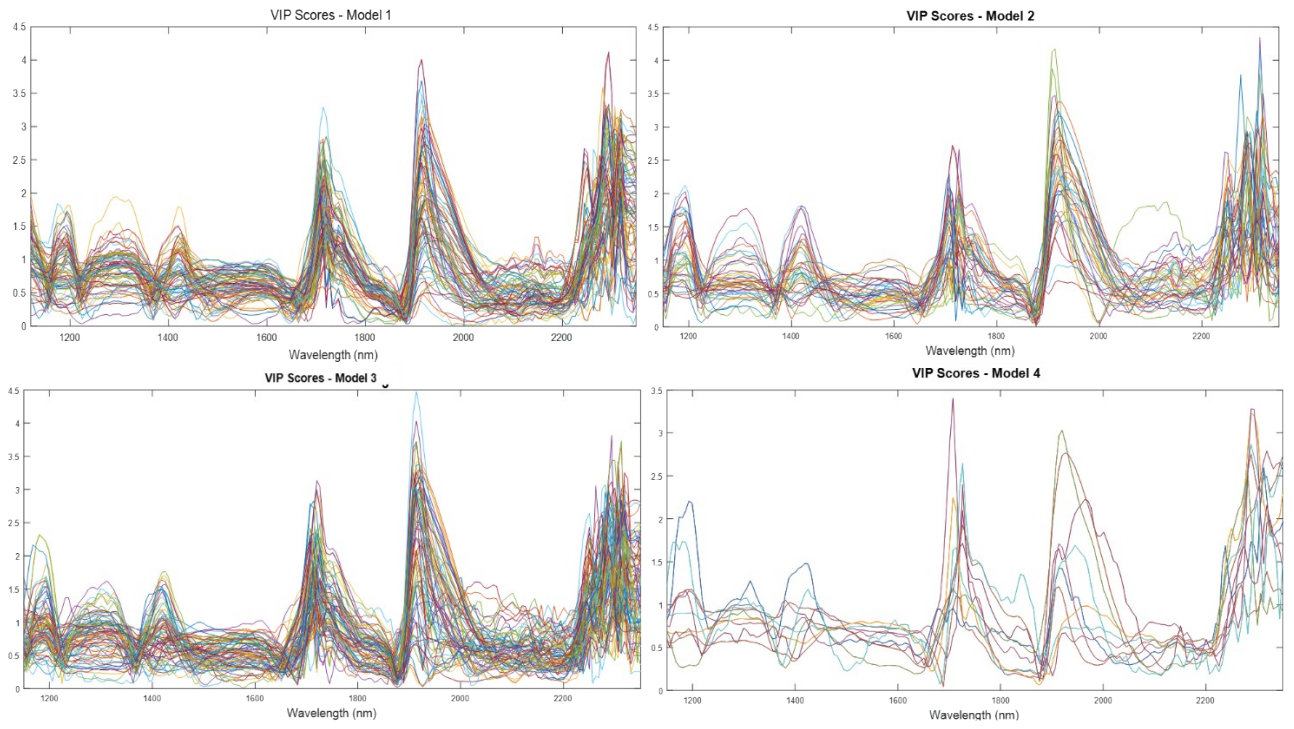

**Figure S1** – VIP Scores for all class and donors in the four PLS-DA models.

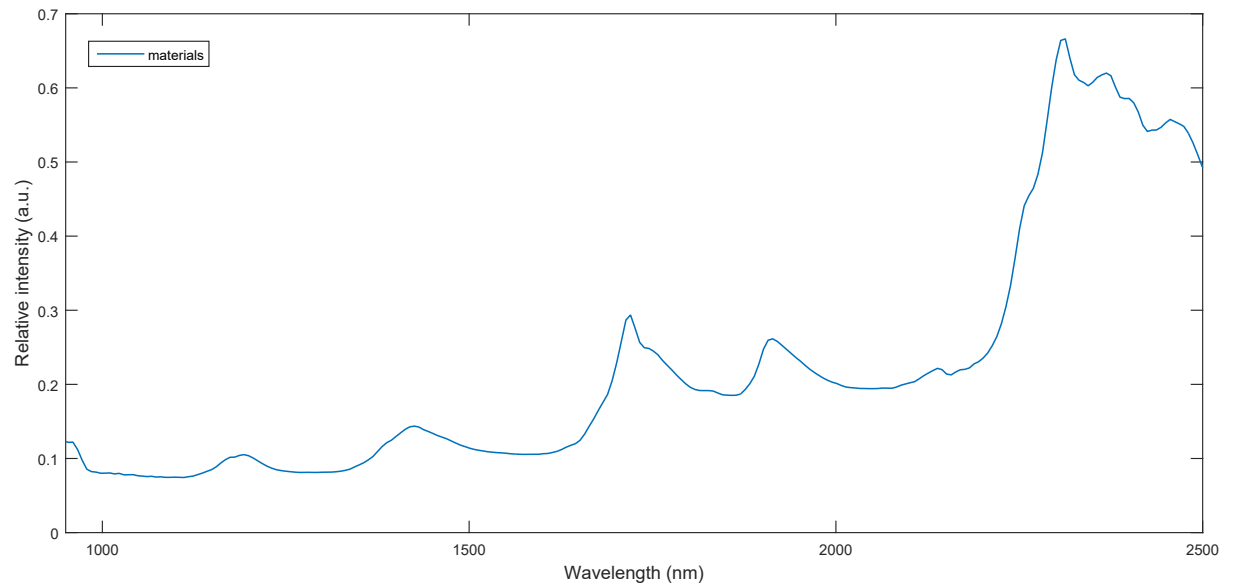

**Figure S2** – Average spectrum of the materials used (acetate, developer powder and tape on alumina plate).

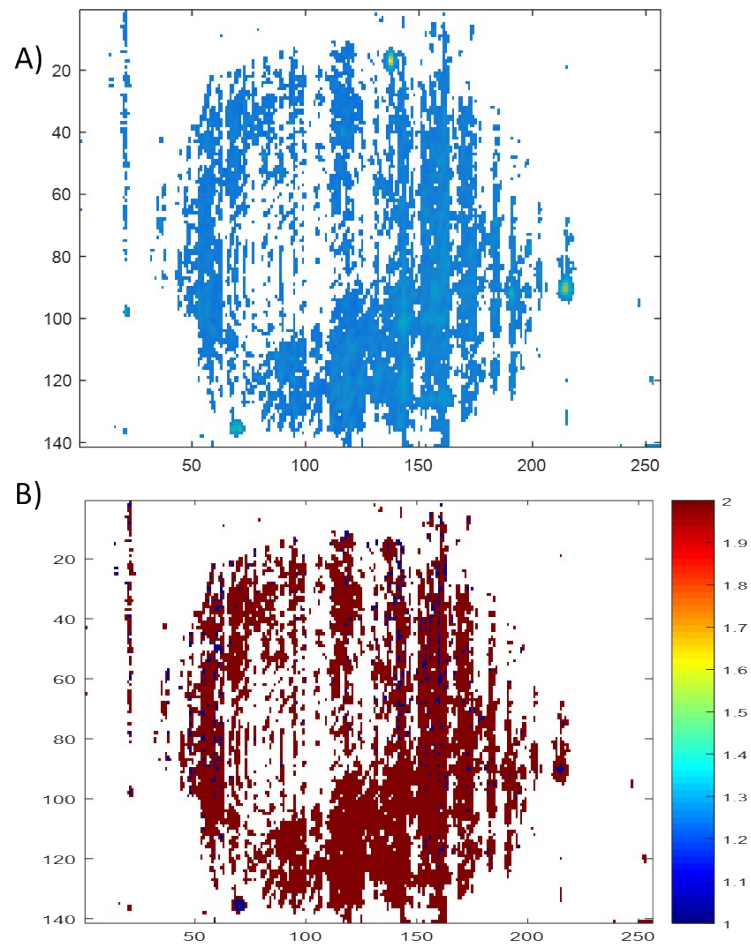

**Figure S3** – Donor 11- Model 4, PLS-DA fingerprint prediction results at 3 days of aging- TE1 (first triplicate).  
A) Selected pixels and B) classification: red pixels were wrongly classified in class 2 and blue pixels were correctly classified in class 1 (5.01%).

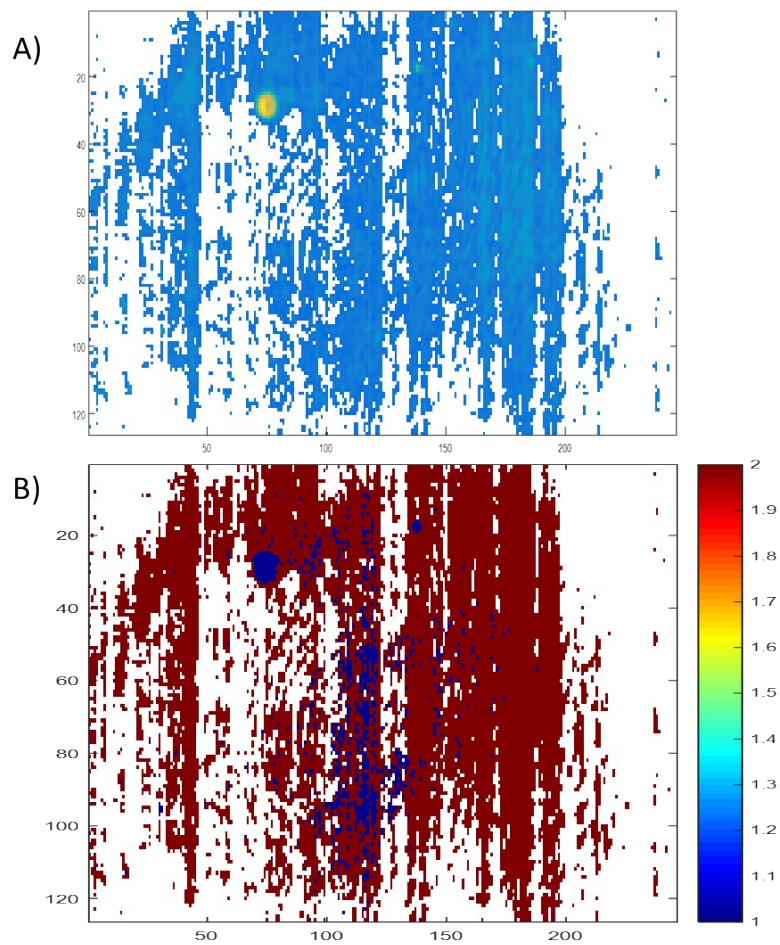

**Figure S4** – Donor 11- Model 4, PLS-DA fingerprint prediction results at 18 days of aging- TE2 (first triplicate).  
 A) Selected pixels and B) classification: red pixels were correctly classified in class 2 (93.08%) and blue pixels were wrongly classified in class 1.
